# Supplementary material for: Proteomic Approach during the Induction of Somatic Embryogenesis in Coffea canephora
Source: MDPI journal article supplement (doi:10.3390/plants12244095), 2023-12-07
Supplement: s1 [file s1]

## Reporting guidelines for mass spectrometry

### 1. General Features

#### 1.1 Global descriptors

- Responsible person (or institutional role if more appropriate); provide name, affiliation, and stable contact information: **Eliei Ruiz May/José Miguel Elizalde Contreras**. Red de Estudios Moleculares Avanzados, Clúster Científico y Tecnológico BioMimic®, Instituto de Ecología A.C. (INECOL), Carretera Antigua a Coatepec No. 351, Congregación el Haya, CP 91070, Xalapa, Veracruz, México. [eliei.ruiz@inecol.mx](mailto:eliei.ruiz@inecol.mx).
- Instrument manufacturer and model: **Orbitrap Fusion Tribrid (Thermo-Fisher Scientific, San Jose, CA, USA)** mass spectrometer.
- Customizations (summary): Global Settings

Method Duration (min)= 120

Ion Source Type = NSI

Spray Voltage: Positive Ion (V) = 3500

Spray Voltage: Negative Ion (V) = 600

Sweep Gas (Arb) = 0

Ion Transfer Tube Temp (°C) = 280

Internal Mass Calibration= Easy-IC

Pressure Mode = Standard

Default Charge State = 2

Experiment 1

Start Time (min) = 0

End Time (min) = 120

Cycle Time (sec) = 3

Do data dependent experiment if no target species are found = False

Scan MasterScan MSn Level = 1

Use Wide Quad Isolation = True

Detector Type = Orbitrap

Orbitrap Resolution = 120K

Mass Range = Normal

Scan Range (m/z) = 350-1500

Maximum Injection Time (ms) = 50

AGC Target = 400000

Microscans = 1

S-Lens RF Level = 60

Use ETD Internal Calibration = True

DataType = Profile

Polarity = Positive  
Source Fragmentation = False  
Filter MIPS  
Filter Type = MIPS  
MIPS On = 2  
Relax Restrictions = True  
Filter ChargeState  
Filter Type = ChargeState  
Include charge state(s) = 2-8  
Include undetermined charge states = False  
Include charge states 25 and higher = False  
Filter DynamicExclusion  
Filter Type = DynamicExclusion  
Exclude after n times = 1  
Exclude isotopes = True  
Perform dependent scan on single charge state per precursor only = False  
If occurs within (s) = 30  
Exclusion duration (s) = 90  
Excl. Mass Width = ppm  
Mass tolerance low = 10  
Mass tolerance high = 10  
Filter IntensityThreshold  
Filter Type = IntensityThreshold  
Signal Intensity = 10000  
Decision  
Precursor Priority = MostIntense  
Scan Event 1  
ChargeRange: 3-3  
AND  
MZRange: 300-1600  
OR  
ChargeRange: 4-4  
AND  
MZRange: 300-1600  
OR  
ChargeRange: 5-5  
AND  
MZRange: 300-1600

OR

ChargeRange: 6-8

Scan Event 2

ChargeRange: 2-2

OR

ChargeRange: 3-3

AND

MZRange: 300-1600

OR

ChargeRange: 4-4

AND

MZRange: 300-1600

OR

ChargeRange: 5-5

AND

MZRange: 300-1600

OR

ChargeRange: 6-8

Scan Event 1

Do data dependent experiment if no target species are found = False

Scan ddMSnScan MSn Level = 2

Top N= 0

Isolation Mode = Quadrupole

Isolation Window = 1.6

Scan Range Mode = Auto Normal FirstMass = 120

ActivationType = HCD

Is Stepped Collision Energy On = False

Stepped Collision Energy (%) = 5

Multistage Activation = False

Neutral Loss Mass = 50.0001

Collision Energy (%) = 28

Detector Type = Orbitrap

Orbitrap Resolution = 30K

Maximum Injection Time (ms) = 50

AGC Target = 50000

Inject ions for all available parallelizable time = True Microscans = 1

Activation Q = 0.25

Use ETD Internal Calibration = False

DataType = Centroid  
Polarity = Positive  
Source Fragmentation = False  
Scan Event 2  
Do data dependent experiment if no target species are found = False  
Scan ddMSnScan MSn Level = 2  
Isolation Mode = Quadrupole  
Top N= 0  
Isolation Window = 1.6  
Use Isolation m/z Offset = False  
Multi-notch Isolation = False  
Scan Range Mode = Auto Normal FirstMass = 100  
ActivationType = CID Collision Energy (%) = 35  
Neutral Loss Mass = 50.0001  
Is Stepped Collision Energy On = False  
Stepped Collision Energy (%) = 5  
Multistage Activation = False  
Is EThcD Active = False  
Detector Type = Orbitrap  
Orbitrap Resolution = 30K  
Maximum Injection Time (ms) = 50  
AGC Target = 50000  
Inject ions for all available parallelizable time = True Microscans = 1  
Activation Q = 0.25  
DataType = Centroid  
Polarity = Positive  
Source Fragmentation = False  
HPLC

Run time: 121.000 [min]

Instrument: MININT-82L3M2J\_1 on minint-82l3m2j Description:

initial Instrument Setup: PumpModule.LoadingPump.%A.Equate: "H2O +0.1% Formic Acid", PumpModule.LoadingPump.%B.Equate: "ACN +0.1%Formic Acid", PumpModule.LoadingPump.%C.Equate: "%C", PumpModule.NC\_Pump.%A.Equate: "%A" H2O +0.1% Formic Acid, PumpModule.NC\_Pump.%B.Equate: "%B" ACN +0.1% Formic Acid

-20.000 [min] Equilibration, PumpModule.LoadingPump.Flow.Nominal: 3.000 [µl/min]  
PumpModule.LoadingPump.%B.Value: 0.0 [%] PumpModule.LoadingPump.%C.Value: 0.0 [%] PumpModule.LoadingPump.Curve:5,

PumpModule.NC\_Pump.Flow.Nominal: 0.250 [µl/min] PumpModule.NC\_Pump.  
%B.Value: 7.0 [%], PumpModule.NC\_Pump.Curve: 5  
0.000 [min] Inject Preparation, Wait PumpModule.LoadingPump.Ready And  
PumpModule.NC\_Pump.Ready And ColumnOven.Ready And Sampler.Ready 0.000  
[min] Inject, Sampler.Inject  
0.000 [min] Start Run, ColumnOven.ColumnOven\_Temp.AcqOn,  
PumpModule.LoadingPump.LoadingPump\_Pressure.AcqOn,  
PumpModule.NC\_Pump.NC\_Pump\_Flow.AcqOn,PumpModule.NC\_Pump.NC\_Pump\_Fl  
ow\_LeftBlk.AcqOn, PumpModule.NC\_Pump.NC\_Pump\_Flow\_RightBlk.AcqOn,  
PumpModule.NC\_Pump.NC\_Pump\_Pressure.AcqOn  
0.000 [min] Run PumpModule.LoadingPump.Flow.Nominal: 3.000 [µl/min],  
PumpModule.LoadingPump.%B.Value: 0.0 [%] PumpModule.LoadingPump.  
%C.Value: 0.0 [%], PumpModule.LoadingPump.Curve: 5,  
PumpModule.NC\_Pump.Flow.Nominal: 0.250 [µl/min], PumpModule.NC\_Pump.  
%B.Value: 7.0 [%], PumpModule.NC\_Pump.Curve: 5  
10.000 [min] PumpModule.NC\_Pump.Flow.Nominal: 0.250 [µl/min],  
PumpModule.NC\_Pump.%B.Value: 7.0 [%], PumpModule.NC\_Pump.Curve: 5,  
ColumnOven.ValveRight: 10\_1  
20.000 [min] PumpModule.LoadingPump.Flow.Nominal: 3.000 [µl/min],  
PumpModule.LoadingPump.%B.Value: 0.0 [%], PumpModule.LoadingPump.%C.Value:  
0.0 [%], PumpModule.LoadingPump.Curve: 5  
30.000 [min] PumpModule.LoadingPump.Flow.Nominal: 0.300 [µl/min],  
PumpModule.LoadingPump.%B.Value: 50.0 [%], PumpModule.LoadingPump.  
%C.Value: 0.0 [%], PumpModule.LoadingPump.Curve: 5  
35.000 [min] PumpModule.NC\_Pump.Flow.Nominal: 0.250 [µl/min],  
PumpModule.NC\_Pump.%B.Value: 19.0 [%], PumpModule.NC\_Pump.Curve: 5  
50.000 [min] PumpModule.NC\_Pump.Flow.Nominal: 0.250 [µl/min],  
PumpModule.NC\_Pump.%B.Value: 20.0 [%], PumpModule.NC\_Pump.Curve: 5  
65.000 [min] PumpModule.NC\_Pump.Flow.Nominal: 0.250 [µl/min],  
PumpModule.NC\_Pump.%B.Value: 25.0 [%], PumpModule.NC\_Pump.Curve: 5  
80.000 [min] PumpModule.LoadingPump.Flow.Nominal: 0.300 [µl/min],  
PumpModule.LoadingPump.%B.Value: 25.0 [%], PumpModule.LoadingPump.  
%C.Value: 0.0 [%], PumpModule.LoadingPump.Curve: 5  
86.000 [min] PumpModule.NC\_Pump.Flow.Nominal: 0.250 [µl/min],  
PumpModule.NC\_Pump.%B.Value: 95.0 [%], PumpModule.NC\_Pump.Curve: 9  
90.000 [min] PumpModule.LoadingPump.Flow.Nominal: 3.000 [µl/min], PumpModule.  
LoadingPump.%B.Value: 0.0 [%], PumpModule.LoadingPump.%C.Value: 0.0 [%],  
PumpModule.LoadingPump.Curve: 5

94.000 [min] PumpModule.NC\_Pump.Flow.Nominal: 0.250 [μl/min], PumpModule.NC\_Pump.%B.Value: 95.0 [%], PumpModule.NC\_Pump.Curve: 5  
100.000 [min] PumpModule.NC\_Pump.Flow.Nominal: 0.250 [μl/min], PumpModule.NC\_Pump.%B.Value: 7.0 [%], PumpModule.NC\_Pump.Curve: 5  
120.000 [min] PumpModule.LoadingPump.Flow.Nominal: 3.000 [μl/min], PumpModule.LoadingPump.%B.Value: 0.0 [%], PumpModule.LoadingPump.%C.Value: 0.0 [%], PumpModule.LoadingPump.Curve: 5, PumpModule.NC\_Pump.Flow.Nominal: 0.250 [μl/min], PumpModule.NC\_Pump.%B.Value: 7.0 [%], PumpModule.NC\_Pump.Curve: 5, ColumnOven.ValveRight: 1\_2  
121.000 [min] Stop Run

## 2. Ion sources

As each spectrum is acquired using only one ionization source, select the one that applies

### 2.1 Electrospray Ionization (ESI)

- Supply type (static or fed): **Static**.
- Interface manufacturer, model: **EASY-Spray™ ES081**
- Sprayer type, manufacturer, model: **EASY spray™ nano ion source (Thermo-Fisher Scientific, San Jose, CA, USA) and interfaced with an UltiMate 3000 RSLC system (Dionex, Sunnyvale, CA, USA).**
- Other parameters if discriminant for the experiment: **NA**

### 2.2 MALDI

- Plate composition (or type): **NA**
- Matrix composition: **NA**
- PSD (or LID/ISD) summary, if performed: **NA**
- Laser type and wavelength: **NA**
- Other laser and source-related parameters, if discriminating for the experiment: **NA**

### 2.3 Other ionization source

- Description of the ion source and relevant parameters: **NA**

## 3. Post-source component

As an MS spectrum or chromatogram performed on one instrument cannot be acquired using all existing analysers and detectors, select the elements that apply.

### 3.1 Analysers

- Ion optics, 'simple' quadrupole, hexapole, Paul trap, linear trap, magnetic sector, FT- ICR, Orbitrap: name of the analysers(s): **Orbitrap Fusion Tribrid**
- Time-of-flight drift tube (TOF): Reflectron status: **NA**

### 3.2 Activation / dissociation

The associated acquisition parameters are covered in 4.1

- Instrument component where the activation/dissociation occurs: **Ion-Routing Multipole/Dual Pressure Linear IonTrap**
- Gas type (when used): **Helium**
- Activation/dissociation type: **CID, HCD**

#### **4. Spectrum and peak list generation and annotation**

##### **4.1 Data acquisition**

- Software name and version: **Xcalibur 4.0.27.10**

##### **4.2 Data analysis**

- Software name and version: **Proteome Discoverer 2.2 (Thermo Fisher Scientific, San Jose, CA, USA)**
- Parameters used in the generation of peak lists or processed spectra: **mass tolerance of 10 ppm and 0.6 Da, two missed cleavages allowed, 0.01 FDR, cysteine carbamidomethylation as fixed modification, methionine oxidation and N-terminal acetylation as dynamic modification.**

##### **4.3 Resulting data**

- Location of source (,raw') and processed files: **ProteomeXchange repository with ID PXD047172 and DOI 10.6019/PXD047172**
- The chromatogram(s) for SRM data and other relevant cases: **NA**
- m/z and intensity values: **350–1500 m/z, intensity threshold of 5.0 e3.**
- MS level: **MS2**
- Ion mode: **positive ion mode**
- For MS level 2 and higher, precursor m/z and charge, if known, with the full mass spectrum/peak list containing that precursor peak, where available: **precursor selection mass range of 400–1200 m/z, precursor ion exclusion width of low 18 m/z and high 5 m/z, data will be available at ProteomeXchange repository with ID PXD047172 and DOI 10.6019/PXD047172**
